# Supplementary material
Source: PubMed Central journal article supplement (PMC4239664)
Supplement: NIHMS634863-supplement-1.pdf [file NIHMS634863-supplement-1.pdf]

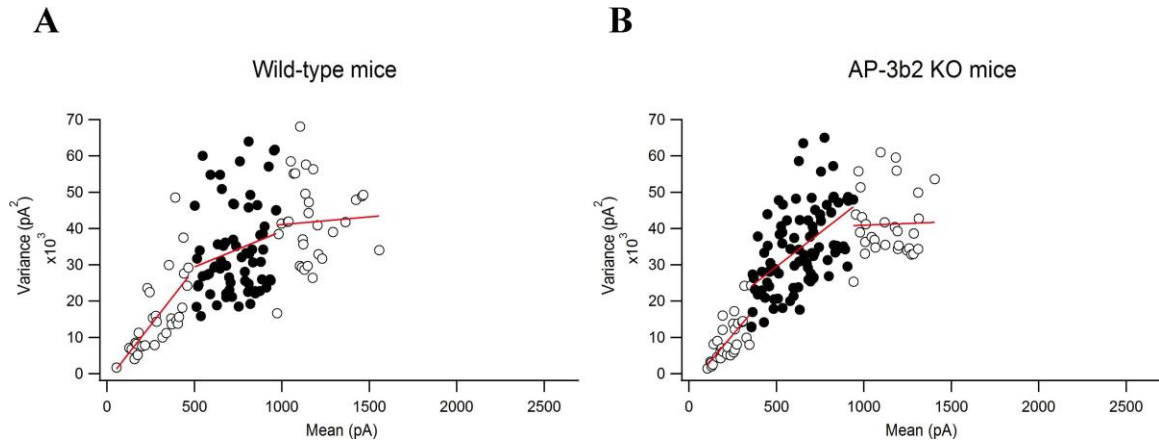

**Supplementary Figure 1.** Validation of conditions required for a parabolic fit for variance-mean analysis. VM data as shown in **Figure 5C** obtained in WT (**A**) and KO (**B**) mice. The first and last 30 points (open circles) and all points in between (filled circles) were fitted with a straight line to show that the data reaches a plateau and, therefore, this dataset is suitable to be fitted with a compound binomial function.

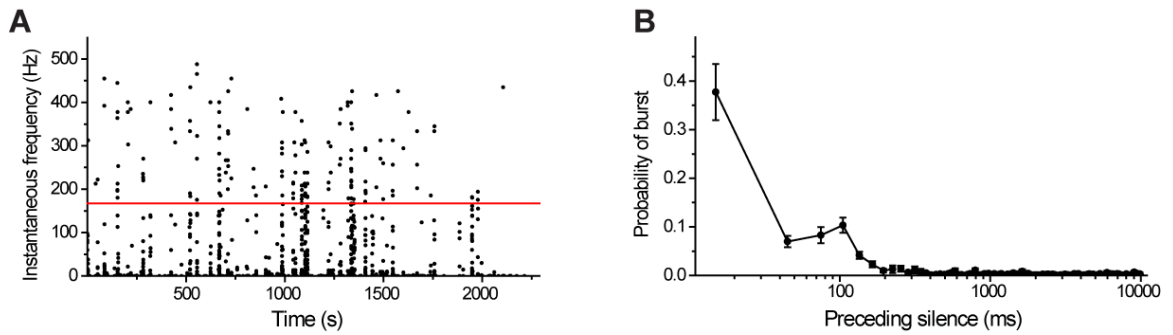

**Supplementary Figure 2.** Analysis of in vivo granule cell firing patterns. **A)** An example of instantaneous frequencies of granule cell firing recorded in vivo. Red line corresponds to 167 Hz. **B)** Plot showing increase in the probability of burst ( $ISI \leq 6$  ms) associated with preceding silence around 100 ms. Data analysed from Mizuseki et al. 2009.

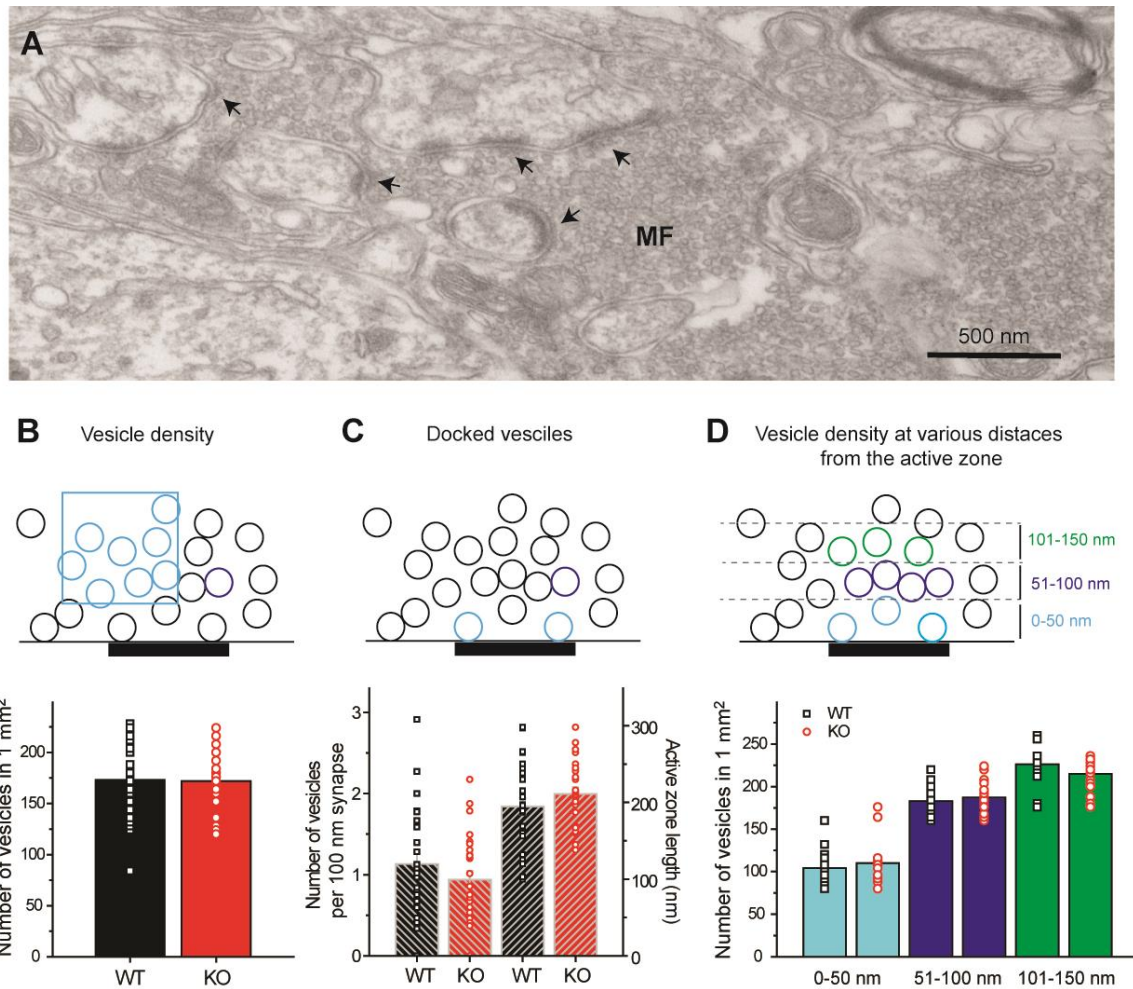

**Supplementary Figure 3.** Electron microscopic comparison of vesicle distribution at MF synapses in WT and KO mice. **A)** Electron microscopic picture of a representative MF terminal. **(B-D)** Top, cartoons depicting three different types of analysis: vesicle density **(B)**, number of docked vesicles and the size of the active zone **(C)** and vesicle density at three various distances from active zone and the size of the active zone **(D)**. Bottom, corresponding bar graphs showing average and individual data from WTs (n=25) and KOs (n=25). No significant difference was observed between the two genetic backgrounds.  $p > 0.05$ ; Student's *t*-test

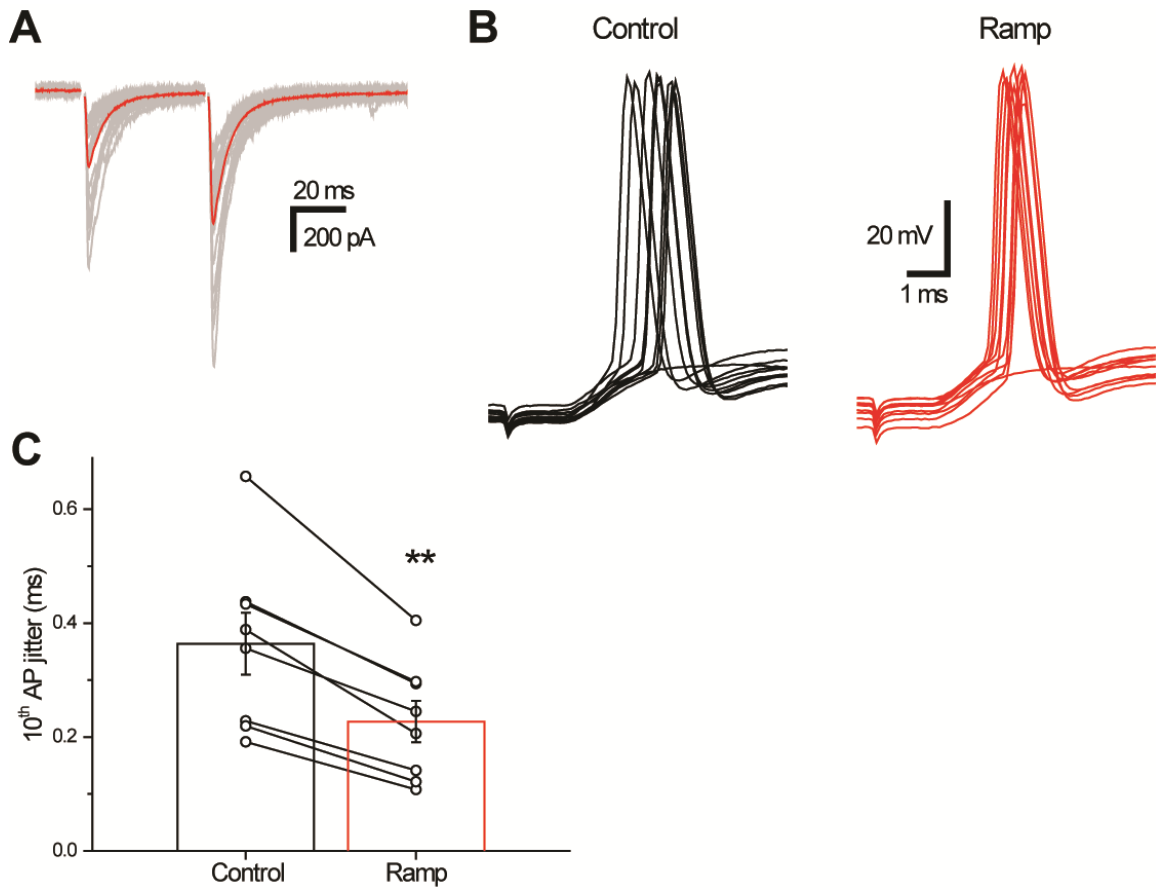

**Supplementary Figure 4.** Compensation of impaired slow voltage change significantly dejitters APs in AP-3b2 KOs. **A**) Example of EPSCs evoked by MF stimulation in KOs. **B**) Current clamp response evoked by repetitive stimulation of the same input (10 stimuli, 20 Hz), only the 10<sup>th</sup> response is shown in control condition (left) and after addition of 4 mV ramp depolarization (right). **C**) Summary plot showing that compensation with 4 mV ramp depolarization significantly decreases AP jitter by the end of stimulation train (n=8). \*\*p < 0.05; Student's *t*-test
